# Supplementary material for: Niosomal Curcumin Suppresses IL17/IL23 Immunopathogenic Axis in Skin Lesions of Psoriatic Patients: A Pilot Randomized Controlled Trial
Source: Life (Basel). 2023 Apr 24;13(5):1076. doi: 10.3390/life13051076 (PMC10224439; doi:10.3390/life13051076)
Supplement: Supplementary file 1 [file life-13-01076-s001.zip › life-2294331-supplementary.pdf]

**Supplementary Table S1.** Key demographic and clinical characteristics of the psoriasis patients included in the study.

| <b>Patient number</b> | <b>Sex</b> | <b>Age</b> | <b>PASI score</b> | <b>Heredity background</b> | <b>Lymphocyte percent in peripheral blood</b> |
|-----------------------|------------|------------|-------------------|----------------------------|-----------------------------------------------|
| PS001                 | Female     | 52.0       | 24.0              | Yes                        | 41                                            |
| PS002                 | Female     | 46.0       | 14.0              | Yes                        | 49                                            |
| PS003                 | Female     | 48.0       | 18.0              | No                         | 35                                            |
| PS004                 | Female     | 44.0       | 20.0              | Yes                        | 58                                            |
| PS005                 | Male       | 38.0       | 14.0              | No                         | 47                                            |
